# Supplementary material for: Improving detection of differentially expressed gene sets by applying cluster enrichment analysis to Gene Ontology
Source: PubMed Central journal article supplement (PMC2731756; doi:10.1186/1471-2105-10-240), 2009-08-05

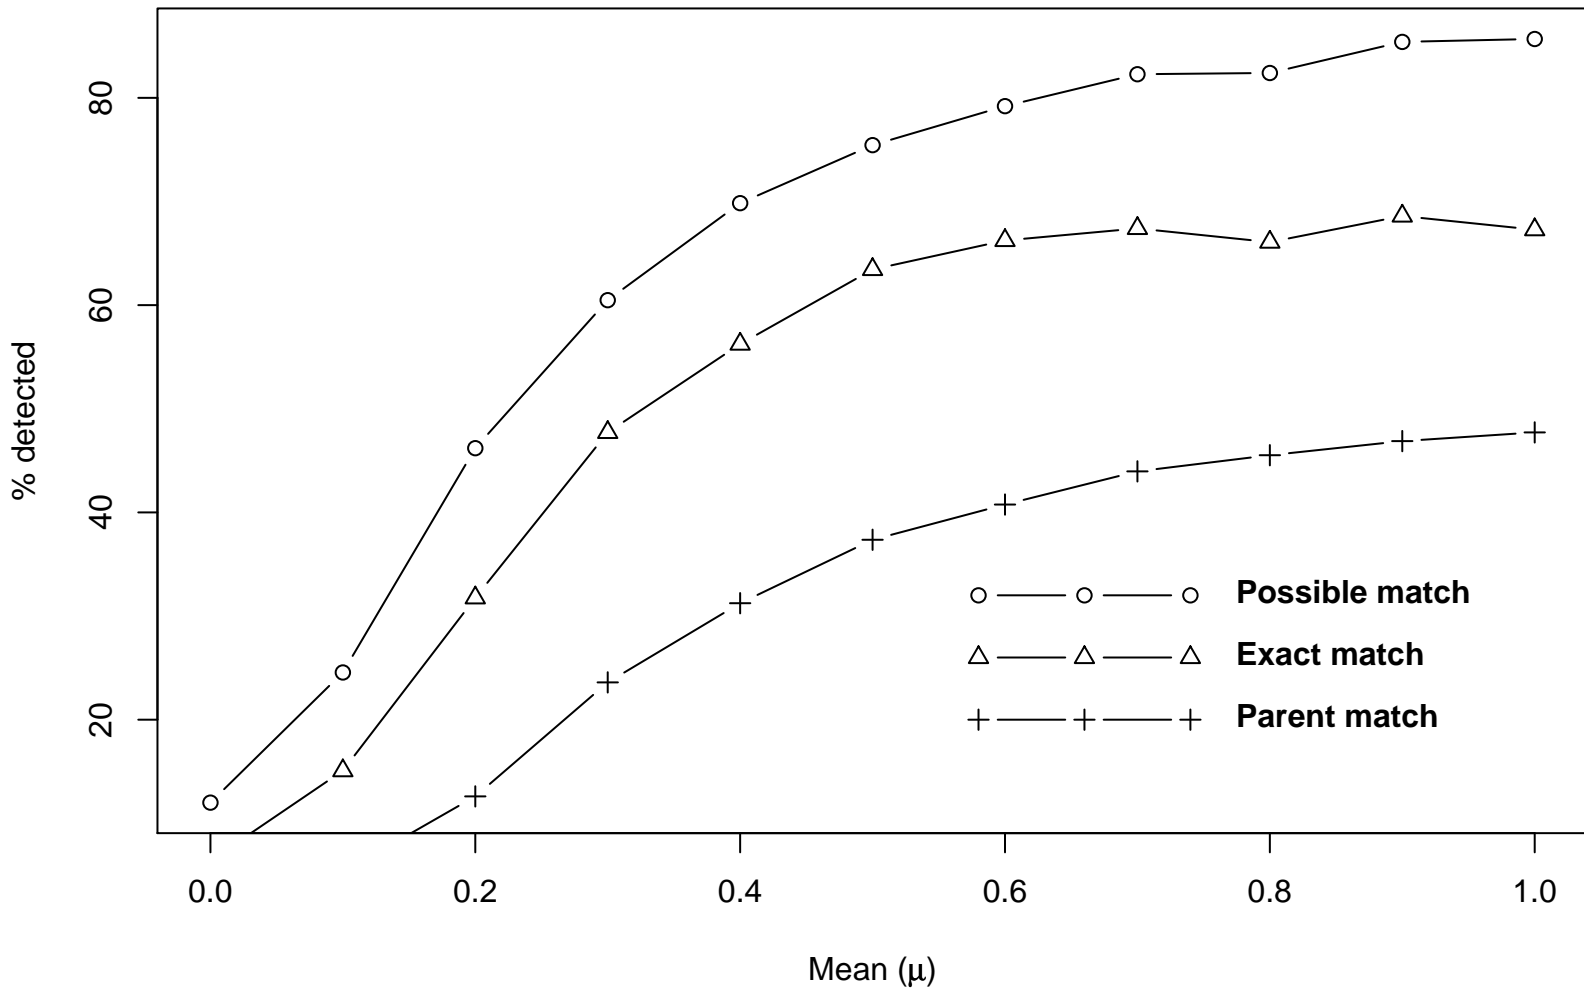

Supplement: 1471-2105-10-240-S1.pdf [file 1471-2105-10-240-S1.pdf]
